# Supplementary material for: Electron-rich π-extended phthalocyanine–thiophene–phthalocyanine triad for the sensitive and selective detection of picric acid
Source: Royal Society of Chemistry journal article supplement (doi:10.1039/c5ra13889b), 2015-01-01
Supplement: c5ra13889b1.pdf [file c5ra13889b1.pdf]

## Electronic supplementary information (ESI)

### 1. Supporting Experimental

#### 1.1. Synthesis

**2,5-Bis-trimethylsilylethynyl-3-hexylthiophene (1).** A mixture of 2,5-dibromo-3-hexylthiophene (1.0 g, 3.066 mmol), trimethylsilylacetylene (0.7 g, 7.0 mmol), CuI (0.035 g, 0.18 mmol), PPh<sub>3</sub> (0.11 g, 0.37 mmol), and triethylamine (10 mL) was stirred in 5 mL of anhydrous THF. After bubbling with N<sub>2</sub> for 20 min, Pd(PPh<sub>3</sub>)<sub>2</sub>Cl<sub>2</sub> (0.10 g, 0.14 mmol) was added and the mixture was heated overnight at 50 °C. The reaction mixture was poured into brine and extracted with chloroform. The organic layer was washed with brine several times and dried over NaSO<sub>4</sub>. After the removal of the solvent, the crude product was purified with alumina column chromatography using hexane as an eluent to yield intermediate **1** as colorless oil. <sup>1</sup>H NMR (400MHz, CDCl<sub>3</sub>): 0.27 (18H, s, CH<sub>3</sub>-Si), 0.90 (3H, t, CH<sub>3</sub>-), 1.28 (6H, m, -CH<sub>2</sub>-), 1.56 (2H, m, -CH<sub>2</sub>-), 2.66 (2H, t, -CH<sub>2</sub>-thiophene), 6.93 (1H, s, thiophene-H).

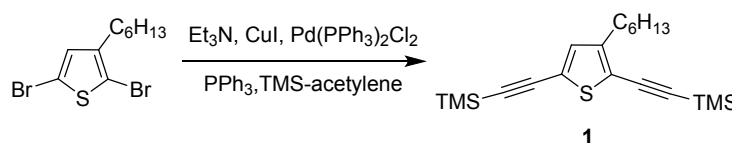

**Tri-tert-butyl-iodophthalocyaninato zinc(II) (2).** A mixture of 4-tert-butylphthalonitrile (0.4 g, 2.17 mmol) and 4-iodophthalonitrile (0.183 g, 0.72 mmol) was refluxed in DMAE (1.5mL) under nitrogen for 15h in the presence of ZnCl<sub>2</sub> (0.100 g, 0.72 mmol). The mixture was concentrated under reduced pressure. The blue solid was subsequently extracted with CH<sub>2</sub>Cl<sub>2</sub> and then washed with water. The corresponding tri-tert-butyl iodophthalocyaninato zinc(II) (**2**) was taken out of tetra-tert-butyl phthalocyaninato zinc(II), di-tert-butyl-diiodophthalocyaninato zinc(II), and tert-

butyl-triiodophthalocyaninato zinc(II) by chromatography (silica gel, hexane/dioxane 4:1). The compound was then washed with hot MeOH after chromatography.  $^1\text{H}$  NMR (400MHz,  $\text{CDCl}_3$ ): 8.7-7.5 (br, ArH), 1.7-1.6 [br,  $\text{C}(\text{CH}_3)_3$ ]; MALDI: 870.155 (M) $^+$ .

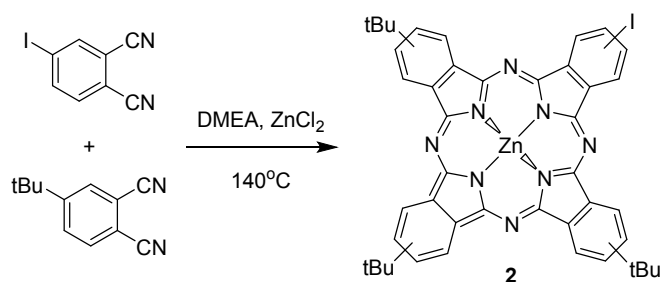

**Pc-thiophene-Pc triad (3).** To a stirred solution of **1**<sup>S1</sup> (8 mg, 0.02 mmol) in dry THF (1 mL) was added a solution of 1 M tetrabutylammonium fluoride (TBAF) (6.5 mg, 0.024 mmol) under a nitrogen atmosphere, which was accompanied by an immediate color change to dark brown. After the completion of the reaction, tri-tert-butyl-iodophthalocyaninato zinc(II) (**2**)<sup>S2</sup> (20 mg, 0.023 mmol), CuI (catalytic amount),  $\text{PPh}_3$  (3 mg, 0.011 mmol),  $\text{Pd}(\text{PPh}_3)_2\text{Cl}_2$  (1.5 mg, 0.0022 mmol) and triethylamine (4 mL) were added and the mixture was then refluxed at  $70^\circ\text{C}$  under a  $\text{N}_2$  atmosphere for 1 day. After the completion of the reaction, the mixture was concentrated under reduced pressure. The green solid was extracted with  $\text{CH}_2\text{Cl}_2$  and then washed with water. The corresponding Pc-triad **3** was purified by chromatography (silica gel, hexane/dioxane 4:1).  $^1\text{H}$  NMR (400MHz,  $\text{CDCl}_3$ ): 7.75 (br, ArH), 2.04 [s,  $\text{CH}_2$ ], 1.6 [br,  $\text{C}(\text{CH}_3)_3$ ], 0.85 (br,  $\text{CH}_2\text{CH}_2\text{CH}_2\text{CH}_2\text{CH}_3$ ); We could not obtained good quality of  $^1\text{H}$  NMR of Pc-triad **3** from broadening and overlap of the aromatic signals, which may be attributed to either extended conjugation or the existence of more than one isomers (from the position of *t*-Bu),<sup>S2, S3</sup> however, a single peak in MALDI data indicating the purity of Pc-triad **3**, MALDI: 1703.534 (M) $^+$ .

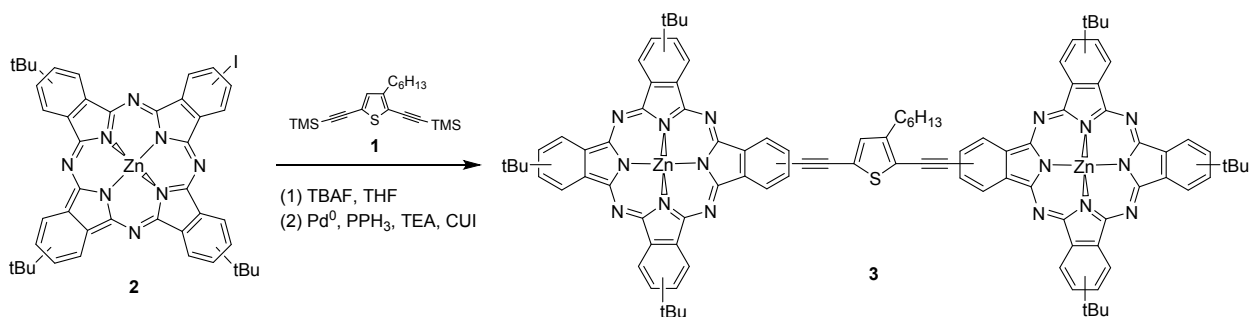

## 1.2. Property characterization

The synthesis of compounds was characterized using MALDI-TOF measurements, with  $\alpha$ -Cyano-4-hydroxy cinnamic acid as matrix (Korea Basic Science Institute, KBSI). The UV and photoluminescence emission spectra were obtained from Lambda 7 spectrometer (Perkin Elmer) and LS-45 spectrofluorophotometer (Perkin Elmer), respectively, with a cuvette of 1 cm path-length. SEM images were analyzed using a FE-SEM apparatus (JEOL Scanning Microscope JSM-6700F). FT-IR spectra were collected by an Avatar 370 FT-IR spectrometer, after the samples were vacuum-dried for a week. XPS measurements were performed on an ESCALAB 250 XPS system (Thermo Fisher Scientific/U.K., KBSI) with Al K $\alpha$  radiation (1486.6 eV) as the X-ray source.

## 2. Supporting Data

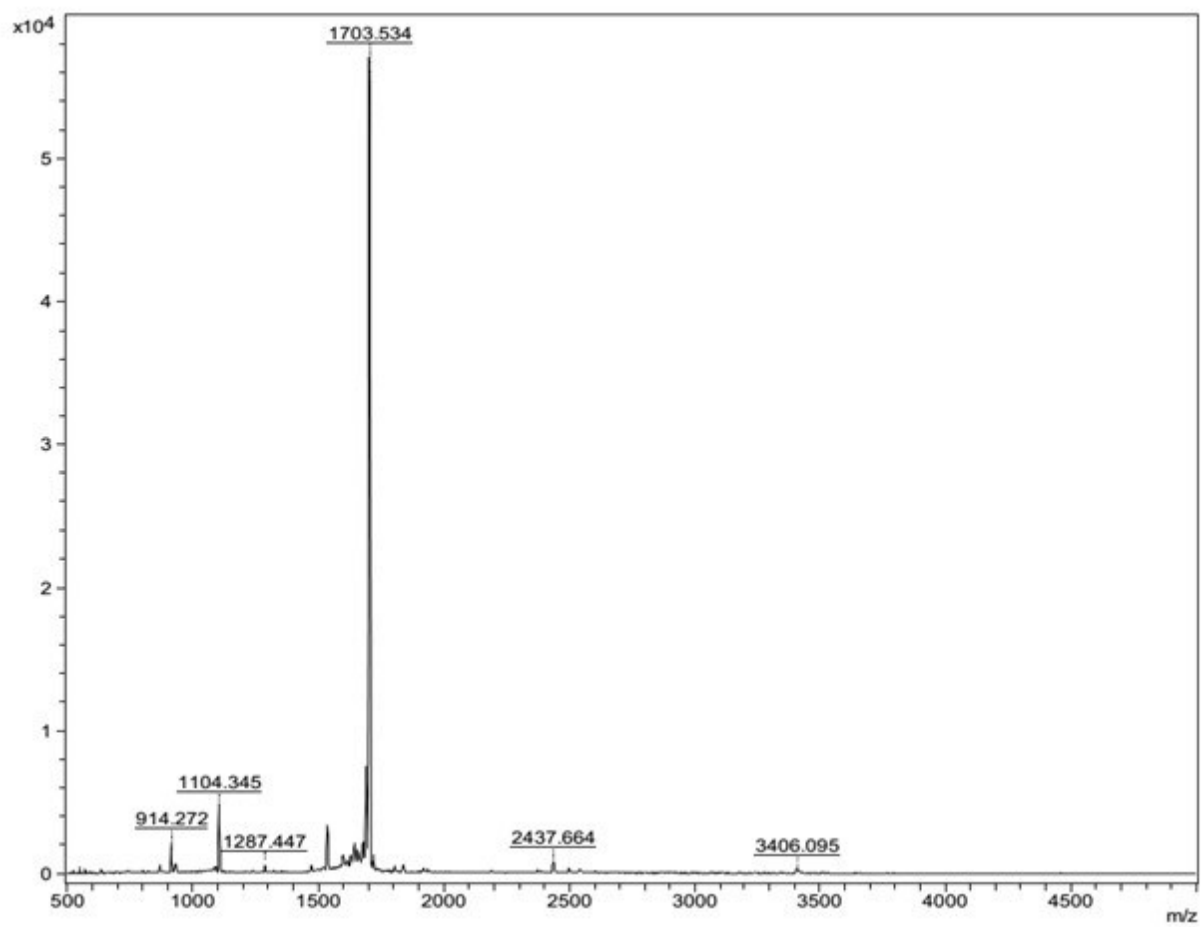

**Fig. S1.** Mass spectrum of Pc-triad 3.

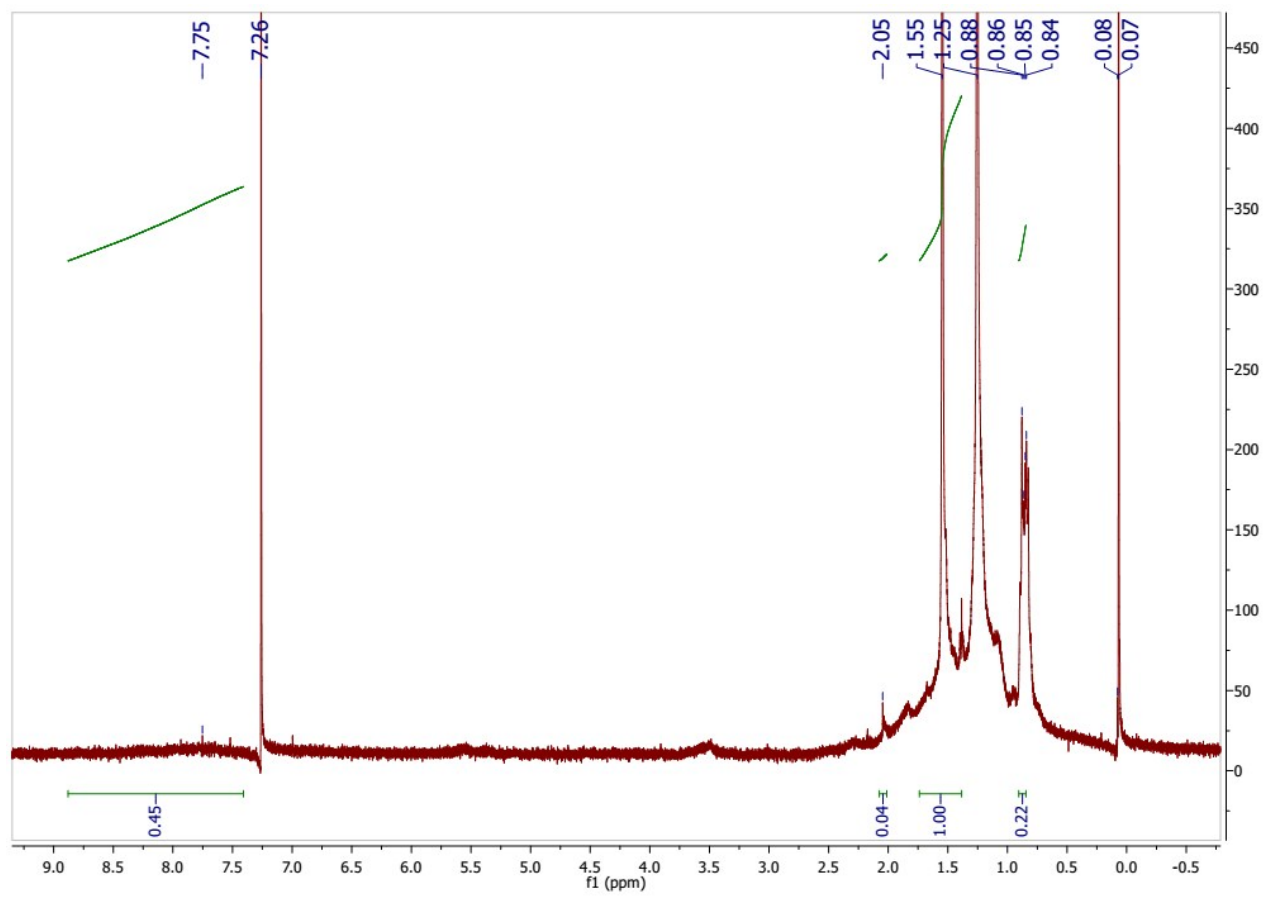

**Fig. S2.**  $^1\text{H}$  NMR spectrum of Pc-triad 3.

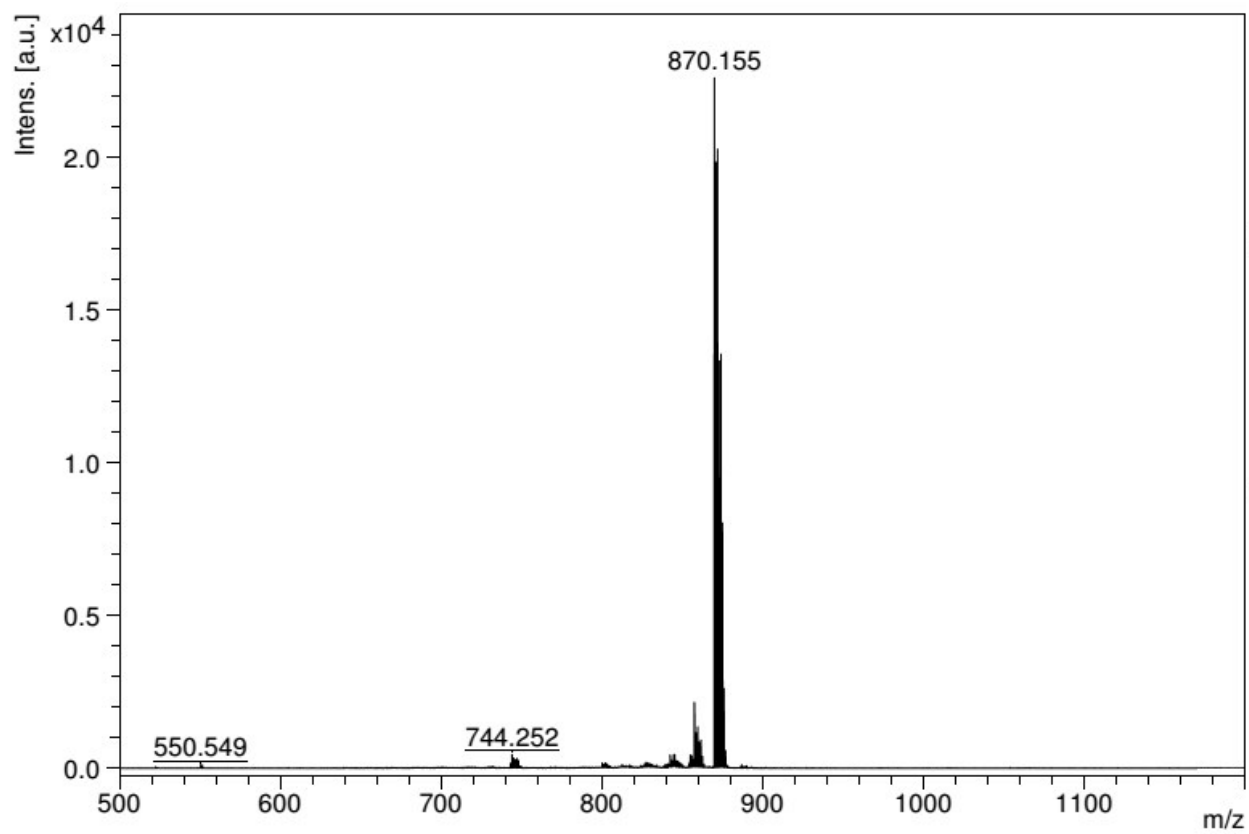

**Fig. S3.** Mass spectrum of spectrum of **2**.

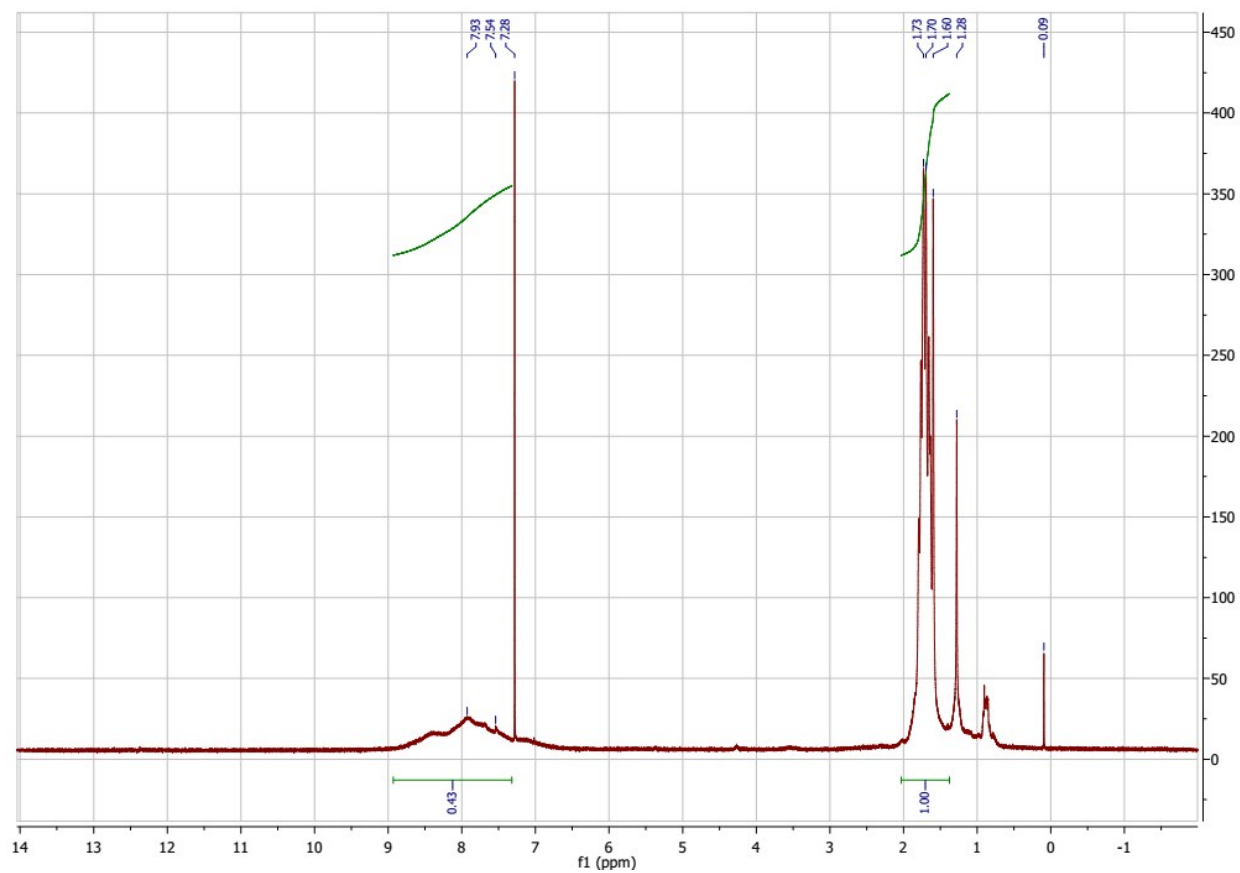

**Fig. S4.**  $^1\text{H}$  NMR spectrum of **2**.

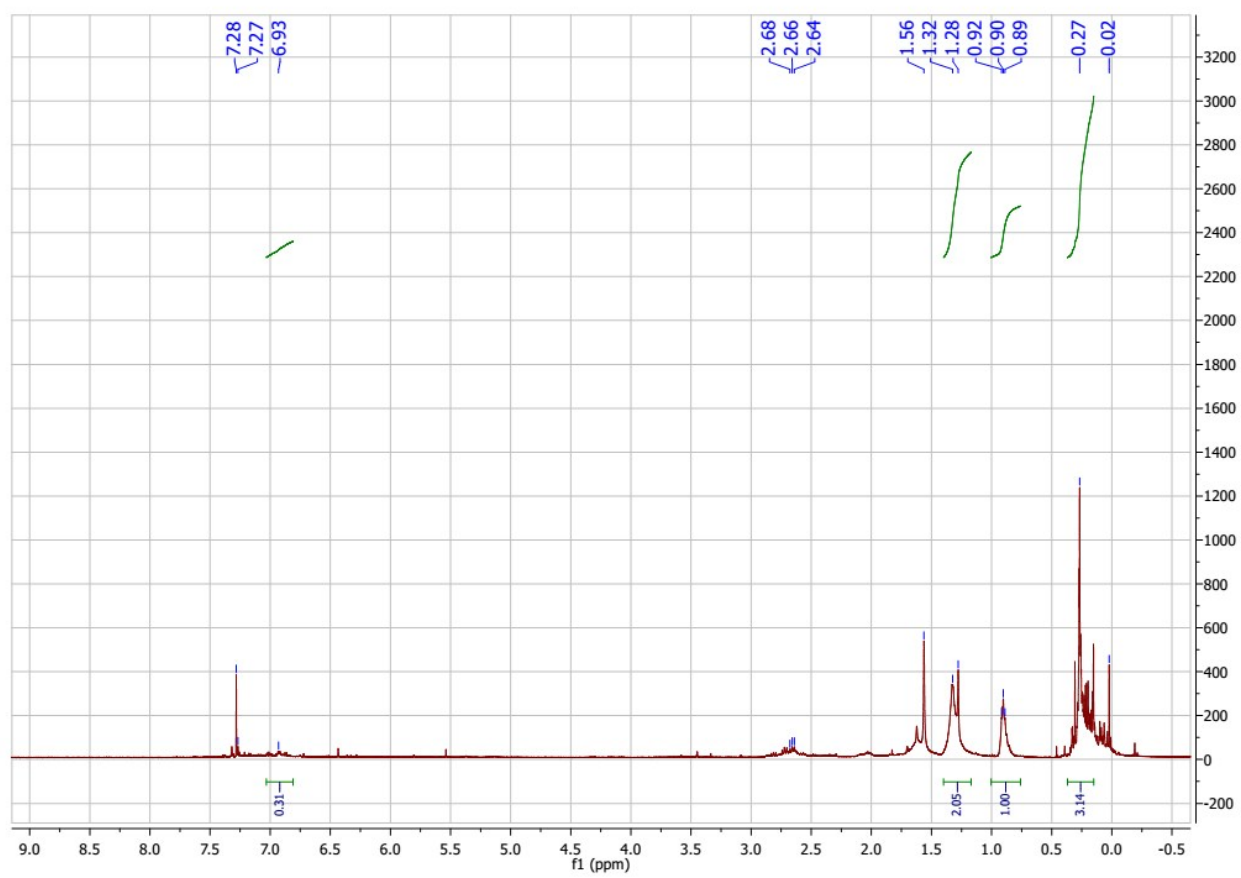

**Fig. S5.** <sup>1</sup>H NMR spectrum of **1**.



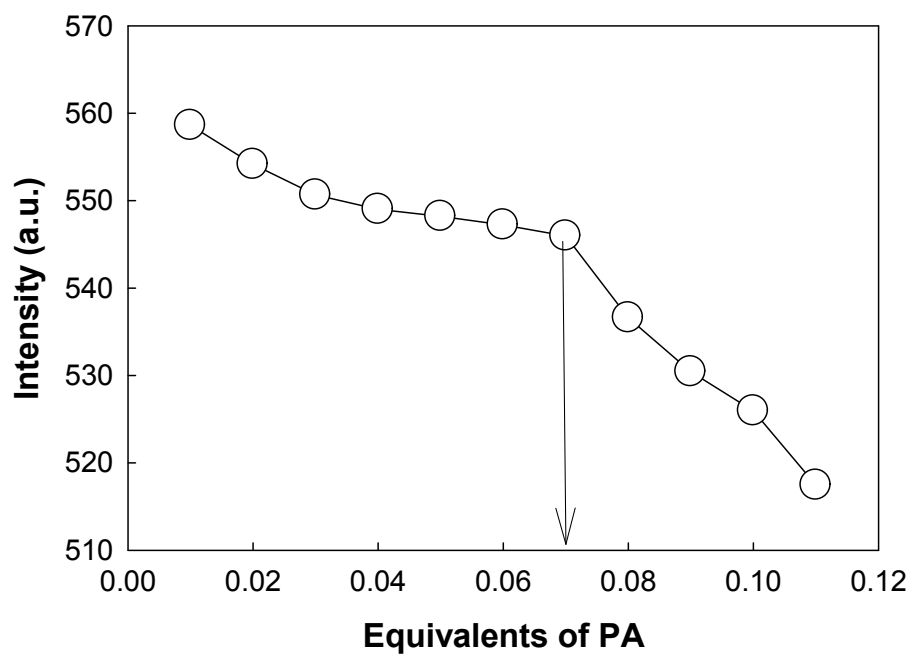

**Fig. S6.** Fluorescence intensity of **3** at 694 nm as a function of PA concentration.

Determination of the detection limit was carried out by fluorescence titration of compound **3** with PA and then fluorescence intensity as a function of PA was plotted. From the graph, the concentration of PA, at which there was a sharp change in the fluorescence intensity was multiplied with the concentration of **3**.

Equation used for calculating detection limit (DL) is given as follows: <sup>S4</sup>

$$DL = C_L \times C_T$$

Where,  $C_L$  = Conc. of Ligand;  $C_T$  = Conc. of Titrant at which change observed.

Thus, detection limit for PA is calculated:

$$D_L = 10 \times 10^{-6} \text{ M} \times 0.07 \text{ equiv.} = 7.0 \times 10^{-7} \text{ M}$$

## Reference

<sup>S1</sup> M. Toba, T. Nakashima and T. Kawai, *Macromolecules*, 2009, **42**, 8068.

<sup>S2</sup> E. M. Maya, P VaAzquez and T. Torres, *Chem. Eur. J.*, 1999, **7**, 2004.

<sup>S3</sup> R. O. Ogbodu, E. Antunes and T. Nyokong, *Dalton Trans.*, 2013, **42**, 10769; T. Onodera and T. Akitsu, *Polyhedron*, 2013, **59**, 107.

<sup>S4</sup> J. X. Liu, H. Chen, Z. Lin and J. M. Lin, *Anal. Chem.*, 2010, **82**, 7380; H. Y. Du, G. He, T. H. Liu, L. P. Ding and Y. Fang, *J. Photoch. Photobio. A*, 2011, **217**, 356.
